# Supplementary material for: Assessing Distribution Patterns and the Relative Abundance of Reintroduced Large Herbivores in the Limpopo National Park, Mozambique
Source: MDPI journal article supplement (doi:10.3390/d13100456), 2021-09-22
Supplement: s1 [file s1]

**Supplementary Materials**

**Table S1.** Camera trap survey effort and detailed information about camera trap performance in five habitat types resettled and not resettled area in Limpopo National Park.

| Measure                                  | Habitat type |       |       |       |       |        | Resettlement of LH |       |        |
|------------------------------------------|--------------|-------|-------|-------|-------|--------|--------------------|-------|--------|
|                                          | LN           | PS    | RV    | SC    | NS    | Total  | RA                 | NRA   | Total  |
| Sampling units ( <i>n</i> ) <sup>1</sup> | 40           | 16    | 10    | 30    | 50    | 146    | 76                 | 70    | 146    |
| Survey effort (trap days/nights)         | 1999         | 1062  | 582   | 2178  | 3712  | 9533   | 4164               | 5369  | 9533   |
| Independent events (IE) <sup>2,3</sup>   | 2528         | 205   | 511   | 569   | 1325  | 5138   | 2881               | 2257  | 5138   |
| Successful images                        | 12819        | 663   | 1832  | 2156  | 4083  | 21553  | 14069              | 7484  | 21553  |
| Successful cameras                       | 38           | 13    | 9     | 28    | 45    | 133    | 70                 | 63    | 133    |
| Mean trapping days/camera                | 52.6         | 70.8  | 64.6  | 77.8  | 78.9  | 69.5*  | 57.04*             | 83.9* | 69.5*  |
| Stolen cameras                           | 1            | 0     | 1     | 1     | 2     | 5      | 1                  | 4     | 5      |
| Non-functional cameras                   | 1            | 1     | 0     | 1     | 1     | 4      | 2                  | 2     | 4      |
| Blank cameras                            | 0            | 2     | 0     | 0     | 2     | 4      | 3                  | 1     | 4      |
| Overall species/target species           | 35/15        | 19/12 | 22/11 | 24/11 | 42/12 | 49/15* | 37/15              | 43/12 | 49/15* |

Total does not mean sum of numbers from different habitats and resettled/not resettled area: 69.5 – is the overall average for 146 sampling units and 49/15 – is the total species (overall/target) photographed in the Limpopo National Park. LN – Lebombo North, PS – Pumbe Sandveld, RV – Rugged Veld, SC – Shrubveld on Calcrete; NS – Nwambia Sandveld, LH – Large herbivores, RA – Resettled area, NRA – Not resettled area.

**Table S2.** Checklist of overall species recorded grouped by taxonomic order and family in Limpopo National Park.

| Taxonomic order | Family      | Species                         | Common name                   | Functional guild       | Habitat type          |      |      |                  |     |     |                   |     |     |                |    |     |             |     |     |    |
|-----------------|-------------|---------------------------------|-------------------------------|------------------------|-----------------------|------|------|------------------|-----|-----|-------------------|-----|-----|----------------|----|-----|-------------|-----|-----|----|
|                 |             |                                 |                               |                        | Lebombo North         |      |      | Nwambia Sandveld |     |     | Shruveld Calcrete |     |     | Pumbe Sandveld |    |     | Rugged Veld |     |     |    |
|                 |             |                                 |                               |                        | IE                    | I    | P    | IE               | I   | P   | IE                | I   | P   | IE             | I  | P   | IE          | I   | P   |    |
|                 |             |                                 |                               |                        |                       |      |      |                  |     |     |                   |     |     |                |    |     |             |     |     |    |
| Artiodactyla    | Bovidae     | <i>Aepyceros melampus</i>       | Impala                        |                        | 386                   | 1277 | 1933 | 71               | 136 | 255 | 44                | 167 | 194 | 19             | 33 | 45  | 71          | 123 | 306 |    |
|                 |             | <i>Connochaetes taurinus</i>    | Blue weldebeest               |                        | 27                    | 63   | 281  |                  |     |     | 5                 | 11  | 12  | 24             | 25 | 54  |             |     |     |    |
|                 |             | <i>Hippotragus niger</i>        | Sable antelope                |                        |                       |      |      |                  |     |     |                   |     |     | 1              | 1  | 1   |             |     |     |    |
|                 |             | <i>Kobus ellipsiprymnus</i>     | Waterbuck                     |                        | 552                   | 955  | 3207 | 1                | 1   | 2   | 4                 | 9   | 8   |                |    |     | 35          | 36  | 106 |    |
|                 |             | <i>Neotragus moschatus</i>      | Suni                          |                        | 1                     | 2    | 3    | 2                | 2   | 6   |                   |     |     |                |    |     |             |     |     |    |
|                 |             | <i>Oreotragus oreotragus</i>    | Klipspringer                  |                        | 19                    | 27   | 85   |                  |     |     |                   |     |     |                |    |     |             |     |     |    |
|                 |             | <i>Raphicerus campestris</i>    | Steenbok                      | Herbiv. <sup>4,5</sup> | 5                     | 9    | 18   | 67               | 73  | 159 | 12                | 12  | 26  | 3              | 3  | 4   | 20          | 20  | 73  |    |
|                 |             | <i>Raphicerus sharpei</i>       | Sharpe's Grysbok              |                        | 23                    | 23   | 84   | 2                | 3   | 4   |                   |     |     |                |    |     |             |     |     |    |
|                 |             | <i>Sylvicapra grimmia</i>       | Common duiker                 |                        | 70                    | 76   | 229  | 358              | 381 | 917 | 55                | 56  | 129 | 24             | 24 | 33  | 121         | 126 | 312 |    |
|                 | Giraffidae  | <i>Syncerus caffer</i>          | Buffalo                       |                        | 65                    | 136  | 364  | 96               | 176 | 517 | 92                | 404 | 663 | 22             | 52 | 229 | 15          | 15  | 37  |    |
|                 |             | <i>Taurotragus oryx</i>         | Eland                         |                        | 3                     | 3    | 15   | 1                | 2   | 3   |                   |     |     |                |    |     |             |     |     |    |
|                 |             | <i>Tragelaphus angasii</i>      | Nyala                         |                        | 337                   | 478  | 1444 | 133              | 171 | 331 | 110               | 143 | 422 | 10             | 13 | 19  | 89          | 116 | 324 |    |
|                 |             | <i>Tragelaphus scriptus</i>     | Bushbuck                      |                        | 20                    | 25   | 68   |                  |     |     |                   |     |     |                |    |     |             |     |     |    |
|                 |             | <i>Tragelaphus strepsiceros</i> | Greater kudu                  |                        | 195                   | 320  | 1266 | 147              | 197 | 484 | 41                | 43  | 98  | 8              | 8  | 15  | 60          | 75  | 302 |    |
|                 |             | <i>Giraffa camaleopardalis</i>  | Giraffe                       |                        | 80                    | 111  | 471  | 17               | 19  | 54  |                   |     |     | 10             | 13 | 20  | 3           | 3   | 9   |    |
|                 |             | Hippopotamidae                  | <i>Hippopotamus amphibius</i> | Hippopotamus           |                       | 2    | 3    | 4                |     |     |                   |     |     |                |    |     |             |     |     |    |
|                 |             |                                 | <i>Phacochoerus africanus</i> | Warthog                |                       | 61   | 108  | 242              | 24  | 43  | 150               | 8   | 10  | 11             | 10 | 10  | 11          | 4   | 7   | 15 |
|                 |             |                                 | <i>Potamochoerus porcus</i>   | Bushpig                | Omniv. <sup>6,7</sup> |      |      |                  | 12  | 15  | 67                | 1   | 1   | 2              |    |     |             |     |     |    |
| Bucerotiformes  | Bucerotidae | <i>Tockus flavirostris</i>      | Hornbills                     | Omniv.                 |                       |      |      | 5                | 5   | 12  |                   |     |     |                |    |     |             |     |     |    |
|                 |             | <i>Canis adustus</i>            | Side-striped jackal           | Carniv. <sup>5,7</sup> | 4                     | 4    | 9    | 1                | 1   | 2   |                   |     |     | 1              | 1  | 1   |             |     |     |    |
|                 | Canidae     | <i>Canis mesomelas</i>          | Black-backed jackal           |                        | 2                     | 2    | 3    | 57               | 59  | 129 | 7                 | 7   | 12  |                |    |     | 8           | 8   | 19  |    |

|                |                            |                                 |                            |                   |           |     |      |    |     |     |    |     |     |    |    |     |    |    |    |
|----------------|----------------------------|---------------------------------|----------------------------|-------------------|-----------|-----|------|----|-----|-----|----|-----|-----|----|----|-----|----|----|----|
| Carnivora      | Felidae                    | <i>Lycaon pictus</i>            | Wild dog                   |                   | 5         | 7   | 32   | 1  | 1   | 3   | 2  | 3   | 3   |    |    |     |    |    |    |
|                |                            | <i>Acinonyx jubatus</i>         | Cheetah                    |                   |           |     |      | 11 | 11  | 30  |    |     |     |    |    |     |    |    |    |
|                |                            | <i>Felis sylvestris lybica</i>  | African Wild Cat           |                   | 3         | 3   | 5    | 12 | 12  | 23  |    |     |     |    |    |     |    |    |    |
|                |                            | <i>Caracal caracal</i>          | Caracal                    |                   |           |     |      | 1  | 1   | 2   | 2  | 2   | 3   |    |    |     |    |    |    |
|                |                            | <i>Panthera pardus</i>          | Leopard                    |                   | 13        | 13  | 35   | 1  | 1   | 3   | 1  | 1   | 1   |    |    |     | 1  | 1  | 2  |
|                |                            | <i>Panthera leo</i>             | Lion                       |                   | 1         | 1   | 2    |    |     |     |    |     |     |    |    |     |    |    |    |
|                |                            | <i>Leptailurus serval</i>       | Serval                     |                   |           |     |      | 6  | 6   | 12  | 2  | 2   | 4   |    |    |     | 2  | 2  | 4  |
|                |                            | Herpestidae                     | <i>Herpestes ichneumon</i> | Large g. mongoose | Carnivore |     |      |    | 2   | 2   | 4  |     |     |    |    |     |    |    |    |
|                |                            |                                 | <i>Mungos mungo</i>        | Banded Mon-goose  | Carnivore |     |      |    | 3   | 3   | 6  |     |     |    |    |     |    |    |    |
|                |                            | Hyaenidae                       | <i>Crocota crocuta</i>     | Spotted Hyaena    | Carnivore | 5   | 5    | 10 | 3   | 3   | 4  | 31  | 35  | 64 | 2  | 2   | 3  | 3  | 3  |
| Mustelidae     | <i>Mellivora capensis</i>  | Honey badger                    | Omnivo                     | 6                 | 6         | 17  | 8    | 8  | 19  | 2   | 2  | 2   |     |    |    | 3   | 3  | 8  |    |
| Protelidae     | <i>Proteles cristatus</i>  | Aardwolf                        | Carnivore                  | 2                 | 2         | 6   | 7    | 7  | 14  |     |    |     |     |    |    |     |    |    |    |
| Viverridae     | <i>Civettictis civetta</i> | Civet                           |                            | 40                | 41        | 99  | 9    | 9  | 21  | 1   | 1  | 1   | 2   | 2  | 4  | 10  | 10 | 30 |    |
|                | <i>Genetta genetta</i>     | Small-spotted genet             |                            | 11                | 11        | 33  | 9    | 9  | 21  | 6   | 6  | 18  |     |    |    | 4   | 4  | 12 |    |
| Crocodylia     | Crocodylidae               | <i>Crocodylus niloticus</i>     | Crocodylus                 | 1                 | 1         | 2   |      |    |     |     |    |     |     |    |    |     |    |    |    |
| Galliformes    | Numididae                  | <i>Numida meleagris</i>         | H. Guineafowl              |                   |           |     | 24   | 88 | 66  |     |    |     |     |    |    |     |    |    |    |
|                | Phasianidae                | <i>Perdix perdix</i>            | Grey partridge             | Granivore         |           |     |      | 22 | 35  | 46  |    |     |     |    |    |     |    |    |    |
| Lagomorpha     | Leporidae                  | <i>Lepus saxatilis</i>          | Scrub hare                 | Herbivore         | 12        | 12  | 34   | 21 | 21  | 37  | 39 | 40  | 114 |    |    |     | 17 | 17 | 81 |
| Primate        | Cercopithecidae            | <i>Chlorocebus aethiops</i>     | Vervet monkey              | Omnivo-rous       | 32        | 61  | 163  | 4  | 8   | 10  | 1  | 1   | 2   | 1  | 1  | 1   |    |    |    |
|                |                            | <i>Papio ursinus</i>            | Chacma baboon              |                   | 123       | 339 | 779  | 21 | 82  | 209 | 14 | 18  | 27  | 1  | 6  | 2   | 5  | 15 | 31 |
| Perissodactyla | Equidae                    | <i>Equus quagga</i>             | Plain zebra                | Herbivore         | 208       | 345 | 1011 | 8  | 12  | 33  | 17 | 35  | 113 | 26 | 43 | 112 | 15 | 23 | 65 |
| Proboscidea    | Elephantidae               | <i>Loxodonta africana</i>       | African elephant           |                   | 117       | 157 | 619  | 80 | 115 | 239 | 72 | 101 | 227 | 34 | 51 | 68  | 21 | 24 | 80 |
|                | Hystriidae                 | <i>Hystrix africaeaustralis</i> | Cape porcupine             | Rodent            | 16        | 19  | 49   | 17 | 26  | 39  |    |     |     | 2  | 3  | 4   | 2  | 2  | 4  |
|                | Pedetidae                  | <i>Pedetes capensis</i>         | Springhare                 |                   |           |     |      | 12 | 15  | 42  |    |     |     |    |    |     |    |    |    |
| Rodentia       | Muridae                    | <i>Saccostomus campestris</i>   | Pouched Mouse              | Omniv.            |           |     |      | 5  | 5   | 12  |    |     |     |    |    |     |    |    |    |

|                  |                 |                                  |                            |        |  |  |  |             |             |              |             |             |             |            |             |             |            |            |            |            |            |             |
|------------------|-----------------|----------------------------------|----------------------------|--------|--|--|--|-------------|-------------|--------------|-------------|-------------|-------------|------------|-------------|-------------|------------|------------|------------|------------|------------|-------------|
| Struthioniformes | Struthionidae   | <i>Struthio camelus</i>          | Ostrich                    | Omniv. |  |  |  | 2           | 2           | 3            |             |             |             |            |             |             |            |            |            |            |            |             |
| Testudines       | Testudinidae    | <i>Kinixys belliana belliana</i> | Bell's hinge-back tortoise |        |  |  |  | 1           | 1           | 2            |             |             |             |            |             |             |            |            |            |            |            |             |
| Tubulidentata    | Orycteropodida. | <i>Orycteropus afer</i>          | Aardvark                   |        |  |  |  | 41          | 41          | 91           |             |             | 5           | 5          | 7           | 2           | 2          | 6          |            |            |            |             |
| <b>TOTAL</b>     | <b>13</b>       | <b>25</b>                        | <b>49</b>                  |        |  |  |  | <b>2528</b> | <b>4734</b> | <b>12819</b> | <b>1325</b> | <b>1808</b> | <b>4083</b> | <b>569</b> | <b>1110</b> | <b>2156</b> | <b>205</b> | <b>297</b> | <b>633</b> | <b>511</b> | <b>635</b> | <b>1832</b> |

IE – Independent events, I – Number of individuals recorded, P – Number of photographs

**Table S3.** Comparisons of Shannon – diversity index using diversity t test among habitat types; between resettled and not resettled area in Limpopo National Park. LN – Lebombo North; PS – Pumbe Sandveld; RV – Rugged Veld; SC – Shrubveld on Calcrete; NS – Nwambia Sandveld

| Habitat type                             |      |                       |      |      |                        |                    |      |                        |    | Resettlement of large herbivores |                       |                       |      |
|------------------------------------------|------|-----------------------|------|------|------------------------|--------------------|------|------------------------|----|----------------------------------|-----------------------|-----------------------|------|
| Richness (S)/100 trap nights             |      |                       |      |      |                        |                    |      |                        |    |                                  |                       |                       |      |
| LN                                       | PS   | RV                    | SC   | NS   | Resettled area         | Not resettled area |      |                        |    |                                  |                       |                       |      |
| 15                                       | 12   | 11                    | 11   | 12   | 15                     | 12                 |      |                        |    |                                  |                       |                       |      |
| Shannon's equitability (E <sub>H</sub> ) |      |                       |      |      |                        |                    |      |                        |    |                                  |                       |                       |      |
| 0.74                                     | 0.88 | 0.83                  | 0.75 | 0.81 | 0.78                   | 0.81               |      |                        |    |                                  |                       |                       |      |
| Shannon – Wiener diversity index (H')    |      |                       |      |      |                        |                    |      |                        |    |                                  |                       |                       |      |
| LN                                       | 1.99 | t = 1,185             | LN   | 1,99 | t = 0,004              | LN                 | 1,99 | t = 1,24               | LN | 1,99                             | t = 0,12              | 2,12                  | 2,02 |
| PS                                       | 2.18 | df = 36,9<br>p = 0,24 | RV   | 1,99 | df = 232,2<br>p = 0,99 | SC                 | 1,78 | df = 65,04<br>p = 0,21 | NS | 2                                | df = 55,1<br>p = 0,9  | t = 0,68<br>df = 73,5 |      |
| PS                                       | 2.18 | t = 1,14              | PS   | 2,18 | t = 1,87               | PS                 | 2,18 | t = 0,88               | RV | 1,99                             | t = 1,21              | p = 0,49              |      |
| RV                                       | 1.99 | df = 40,9<br>p = 0,25 | SC   | 1,78 | df = 65,5<br>p = 0,06  | NS                 | 2    | df = 57,1<br>p = 0,38  | SC | 1,78                             | df = 71,5<br>p = 0,23 |                       |      |
| RV                                       | 1.99 | t = 0,11              | SC   | 1,78 | t = 1,1                |                    |      |                        |    |                                  |                       |                       |      |
| NS                                       | 2.0  | df = 61,6<br>p = 0,9  | NS   | 2    | df = 81,2<br>p = 0,27  |                    |      |                        |    |                                  |                       |                       |      |

**Table S4.** Pairwise comparison of grazer – browser – mixed feeder ratio within and among habitat types and between resettled and not resettled area. Significant differences between group means/medians ( $p < 0.05$ ) were obtained using One-Way ANOVA or Kruskal-Wallis test.

|       | LN_GZ                    | LN_BW                                   | LN_MF                              | PS_GZ                          | PS_BW                                | PS_MF                       | RV_GZ                                   | RV_BW                                 | RV_MF                                  | SC_GZ                         | SC_BW                         | SC_MF                            | NS_GZ                                  | NS_BW                           | NS_MF                |
|-------|--------------------------|-----------------------------------------|------------------------------------|--------------------------------|--------------------------------------|-----------------------------|-----------------------------------------|---------------------------------------|----------------------------------------|-------------------------------|-------------------------------|----------------------------------|----------------------------------------|---------------------------------|----------------------|
| LN_GZ |                          | <b>F(1,74)=<br/>29.83;<br/>p=0.0006</b> |                                    | F(1, 51) =<br>0.02; p =<br>0.9 |                                      |                             | <b>F(1,45)=<br/>23.51;<br/>p=0.0001</b> |                                       |                                        | <b>KW = 7.38;<br/>p=0.006</b> |                               |                                  | <b>F(1,83)=<br/>48.87;<br/>p=0.006</b> |                                 |                      |
| LN_BW |                          |                                         | <b>KW =<br/>22.74;<br/>p=0.001</b> |                                | KW =<br>0.02;<br>p=0.9               |                             |                                         | <b>F(1,45)=<br/>17.9;<br/>p=0.001</b> |                                        |                               | KW = 3.37;<br>p=0.06          |                                  |                                        | <b>KW = 23.08;<br/>p=0.0001</b> |                      |
| LN_MF | F(1,74)=<br>29.83; p=0.9 |                                         |                                    |                                |                                      | F(1,51)=<br>3.44;<br>p=0.06 |                                         |                                       | F(1,45)=<br>0.78;<br>p=0.38            |                               |                               | KW =<br>3.47;<br>p=0.06          |                                        |                                 | KW = 3.51;<br>p=0.06 |
| PS_GZ |                          |                                         |                                    |                                | <b>F(1,28)=<br/>4.55;<br/>p=0.04</b> | F(1,28)=<br>1.03;<br>p=0.31 | <b>F(1,22)=<br/>8.03;<br/>p=0.009</b>   |                                       |                                        | KW = 2.0;<br>p=0.14           |                               |                                  | <b>KW =<br/>8.13;<br/>p=0.002</b>      |                                 |                      |
| PS_BW |                          |                                         |                                    |                                |                                      | F(1,28)=<br>1.4; p=0.24     |                                         | <b>KW =<br/>5.98;<br/>p=0.01</b>      |                                        |                               | KW = 1.03;<br>p=0.28          |                                  |                                        | <b>KW = 12.43;<br/>p=0.0004</b> |                      |
| PS_MF |                          |                                         |                                    |                                |                                      |                             |                                         |                                       | F(1,22)=<br>3.57;<br>p=0.07            |                               |                               | <b>KW =<br/>5.98;<br/>p=0.01</b> |                                        |                                 | KW = 0.42;<br>p=0.51 |
| RV_GZ |                          |                                         |                                    |                                |                                      |                             |                                         | <b>KW =<br/>10.67;<br/>p=0.001</b>    | <b>F(1,16)=<br/>26.3;<br/>p=0.0001</b> | KW = 1.17;<br>p=0.26          |                               |                                  | KW =<br>0.05;<br>p=0.8                 |                                 |                      |
| RV_BW |                          |                                         |                                    |                                |                                      |                             |                                         |                                       | F(1,16)=<br>0.1;<br>p=0.75             |                               | <b>KW = 9.16;<br/>p=0.001</b> |                                  |                                        | KW = 0.73;<br>p=0.38            |                      |

|                                                                    |                   |                            |                            |                    |                           |                   |                            |  |  |  |  |  |                     |                     |                     |                     |
|--------------------------------------------------------------------|-------------------|----------------------------|----------------------------|--------------------|---------------------------|-------------------|----------------------------|--|--|--|--|--|---------------------|---------------------|---------------------|---------------------|
| RV_MF                                                              |                   |                            |                            |                    |                           |                   |                            |  |  |  |  |  | KW = 0.61; p=0.43   |                     |                     | KW = 3.23; p=0.07   |
| SC_GZ                                                              |                   |                            |                            |                    |                           |                   |                            |  |  |  |  |  | KW = 1.03; p=0.28   | KW = 12.1; p=0.0004 | KW = 2.99; p=0.07   |                     |
| SC_BW                                                              |                   |                            |                            |                    |                           |                   |                            |  |  |  |  |  | KW = 21.2; p=0.0002 |                     | KW = 21.3; p=0.0001 |                     |
| SC_MF                                                              |                   |                            |                            |                    |                           |                   |                            |  |  |  |  |  |                     |                     |                     | KW = 9.17; p=0.002  |
| NS_GZ                                                              |                   |                            |                            |                    |                           |                   |                            |  |  |  |  |  |                     |                     | KW = 33.7; p=0.0003 | KW = 24.2; p=0.0005 |
| NS_BW                                                              |                   |                            |                            |                    |                           |                   |                            |  |  |  |  |  |                     |                     |                     | KW = 7.68; p=0.006  |
| <b>Comparison between LH resettled area and not resettled area</b> |                   |                            |                            |                    |                           |                   |                            |  |  |  |  |  |                     |                     |                     |                     |
| RA_GZ vs RA_BW                                                     | RA_GZ vs RA_MF    | RA_BW vs RA_MF             | RA_GZ vs NRA_GZ            | RA_MFvs NRA_MF     | NRA_GZ vs NRA_MF          | NRA_BW vs NRA_MF  | RA_BW vs NRA_BW            |  |  |  |  |  |                     |                     |                     |                     |
| <b>KW = 19.6; p=0.0008</b>                                         | KW = 0.49; p=0.48 | <b>KW = 14.7; p=0.0001</b> | <b>KW = 42.5; p=0.0003</b> | KW = 3.74; p=0.053 | <b>KW = 56.8; p=0.002</b> | KW = 0.71; p=0.39 | <b>KW = 17.1; p=0.0003</b> |  |  |  |  |  |                     |                     |                     |                     |
| NRA_GZvs NRA_BW                                                    |                   |                            |                            |                    |                           |                   |                            |  |  |  |  |  |                     |                     |                     |                     |
| <b>KW = 35.7; p=0.0009</b>                                         |                   |                            |                            |                    |                           |                   |                            |  |  |  |  |  |                     |                     |                     |                     |

LN – Lebombo North, PS – Pumbe Sandveld, RV – Rugged Veld, SC – Shrubveld on Calcrete, NS – Nwambia Sandveld, GZ – grazers, BW – browsers, MF – mixed feeders, RA – resettled area, NRA – not resettled area, KW – Kruskal-Wallis value.

**Table S5.** Large herbivores species recorded by habitat type and resettled/not resettled area in Limpopo National Park; RAI – relative abundance based on detected individuals per species per 100 trap nights <sup>89</sup>; IE – independents events; *n* – nr of sample units (camera traps).

| Species                | Habitat type                   |      |                                 |      |                              |       |                                        |      |                                   |      | Resettlement of large herbivores        |      |                                           |      |
|------------------------|--------------------------------|------|---------------------------------|------|------------------------------|-------|----------------------------------------|------|-----------------------------------|------|-----------------------------------------|------|-------------------------------------------|------|
|                        | Lebombo North<br><i>n</i> = 38 |      | Pumbe Sandveld<br><i>n</i> = 15 |      | Rugged Veld<br><i>n</i> = 10 |       | Shrubveld on Calcrete<br><i>n</i> = 28 |      | Nwambia Sandveld<br><i>n</i> = 47 |      | LH resettled area<br>(RA) <i>n</i> = 76 |      | Not resettled area<br>(NRA) <i>n</i> = 70 |      |
|                        | IE                             | RAI  | IE                              | RAI  | IE                           | RAI   | IE                                     | RAI  | IE                                | RAI  | IE                                      | RAI  | IE                                        | RAI  |
| Warthog                | 61                             | 3.05 | 10                              | 0.94 | 4                            | 0.69  | 8                                      | 0.37 | 24                                | 0.65 | 86                                      | 2.07 | 20                                        | 0.37 |
| Waterbuck              | 552                            | 27.6 | –                               | –    | 35                           | 6.01  | 4                                      | 0.18 | 1                                 | 0.03 | 555                                     | 13.3 | 37                                        | 0.69 |
| Blue wildebeest        | 27                             | 1.35 | 24                              | 2.26 | –                            | –     | 5                                      | 0.23 | –                                 | –    | 57                                      | 1.37 | –                                         | –    |
| Plains zebra           | 208                            | 10.4 | 26                              | 2.45 | 15                           | 2.58  | 17                                     | 0.78 | 8                                 | 0.22 | 256                                     | 6.15 | 17                                        | 0.32 |
| African buffalo        | 64                             | 3.2  | 22                              | 2.07 | 15                           | 2.58  | 92                                     | 4.22 | 96                                | 2.59 | 168                                     | 4.03 | 122                                       | 2.27 |
| Common duiker          | 70                             | 3.5  | 24                              | 2.26 | 121                          | 20.8  | 52                                     | 2.39 | 358                               | 9.64 | 145                                     | 3.48 | 478                                       | 8.9  |
| Bushbuck               | 20                             | 1.0  | –                               | –    | –                            | –     | –                                      | –    | –                                 | –    | 20                                      | 0.48 | –                                         | –    |
| Greater kudu           | 195                            | 9.76 | 8                               | 0.75 | 60                           | 10.31 | 41                                     | 1.88 | 147                               | 3.96 | 236                                     | 5.67 | 217                                       | 4.04 |
| Giraffe                | 80                             | 4.0  | 10                              | 0.94 | 3                            | 0.52  | –                                      | –    | 17                                | 0.45 | 108                                     | 2.6  | 3                                         | 0.06 |
| Steenbok               | 5                              | 0.25 | 3                               | 0.28 | 20                           | 3.44  | 13                                     | 0.6  | 67                                | 1.8  | 11                                      | 0.26 | 99                                        | 1.84 |
| Impala                 | 386                            | 19.3 | 19                              | 1.79 | 71                           | 12.2  | 44                                     | 2.02 | 72                                | 1.94 | 441                                     | 10.6 | 150                                       | 2.8  |
| Nyala                  | 337                            | 16.9 | 10                              | 0.94 | 89                           | 15.3  | 110                                    | 5.05 | 133                               | 3.58 | 352                                     | 8.45 | 325                                       | 6.05 |
| Sable antelope         | 1                              | 0.05 | 1                               | 0.09 | –                            | –     | –                                      | –    | –                                 | –    | 2                                       | 0.05 | –                                         | –    |
| Eland                  | 3                              | 0.15 | –                               | –    | –                            | –     | –                                      | –    | 1                                 | 0.03 | 4                                       | 0.09 | 1                                         | 0.02 |
| African elephant       | 118                            | 5.9  | 34                              | 3.2  | 21                           | 3.61  | 74                                     | 3.4  | 80                                | 2.16 | 193                                     | 4.63 | 133                                       | 2.48 |
| Total Wildlife RAI     | 106.4                          |      | 17.9                            |      | 78.04                        |       | 21.12                                  |      | 27.05                             |      | 63.23                                   |      | 29.84                                     |      |
| Grazer's ratio (%)     | 42.9                           |      | 43                              |      | 15.2                         |       | 27.4                                   |      | 12.8                              |      | 42.6                                    |      | 12.2                                      |      |
| Browsers ratio (%)     | 17.1                           |      | 22                              |      | 40.5                         |       | 20.2                                   |      | 52                                |      | 19.3                                    |      | 43.6                                      |      |
| Mixed feeder ratio (%) | 40                             |      | 35                              |      | 44.3                         |       | 52.4                                   |      | 35.2                              |      | 38.1                                    |      | 44.2                                      |      |

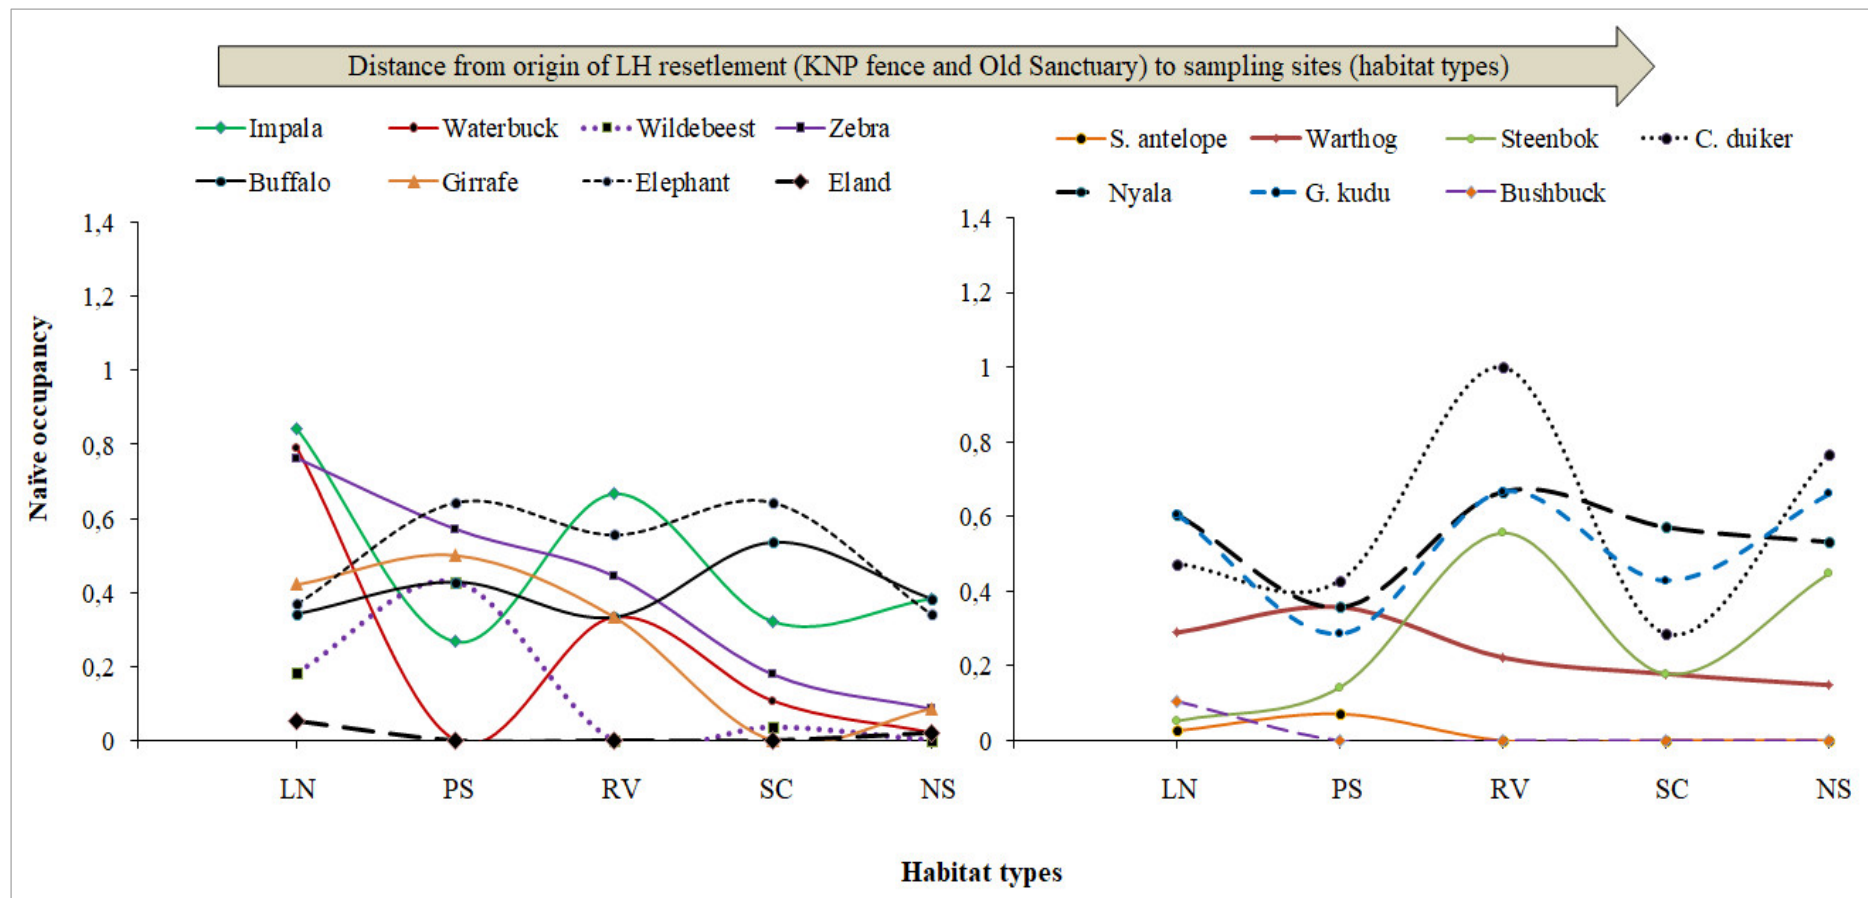

**Figure S1.** Specie-specific naïve occupancy of reintroduced LH among habitat types in the Limpopo National Park. LN – Lebombo North, PS – Pumbe Sandveld, RV – Rugged Veld, SC – Shrubveld on Calcrete, NS – Nwambia Sandveld



## References

1. Mena, J.L.; Yagui, H.; Tejada, V.; Cabrera, J.; Pacheco-Esquivel, J.; Rivero, J.; Pastor, P. Abundance of Jaguars and Occupancy of Medium- and Large-Sized Vertebrates in a Transboundary Conservation Landscape in the Northwestern Amazon. *Glob. Ecol. Conserv.* **2020**, *23*, e01079. <https://doi.org/10.1016/j.gecco.2020.e01079>.
2. O'Brien, T.G.; Kinnaird, M.F.; Wibisono, H.T. Crouching Tigers, Hidden Prey: Sumatran Tiger and Prey Populations in a Tropical Forest Landscape. *Anim. Conserv.* **2003**, *6*, 131–139. <https://doi.org/10.1017/S1367943003003172>.
3. Tobler, M.W.; Carrillo-Percegué, S.E.; Pitman, R.L.; Mares, R.; Powell, G. An Evaluation of Camera Traps for Inventorying Large and Medium Sized Terrestrial Rainforest Mammals. *Anim. Conserv.* **2008**, *11*, 169–178. <https://doi.org/10.1111/j.1469-1795.2008.00169.x>.
4. Skinner, J.D.; Chimimba, C. *The Mammals of the Southern African Sub-Region*, 3rd ed.; Cambridge University Press: Cambridge, UK, 2005.
5. Estes, R.D. *The Behavior Guide to African Mammals: Including Hoofed Mammals, Carnivores, Primates*, 1st ed.; University of California Press: Berkeley, USA, 2012.
6. Walker, C. *Signs of the Wild. A Field Guide to the Spoor & Signs of the Mammals of Southern Africa*, 5th ed.; Struik Publishers: South Africa, 1997.
7. Stuart, C.T.; Stuart, M.D. *Field Guide to Mammals of Southern Africa*, 3rd ed.; Struik Publishers: South Africa, 2001.
8. Jenks, K.E.; Chanteap, P.; Damrongchainarong, K.; Cutter, P.; Cutter, P.; Redford, T.; Lynam, A.J.; Howard, J.; Leimgruber, P. Using Relative Abundance Indices from Camera-Trapping to Test Wildlife Conservation Hypotheses – An Example from Khao Yai National Park, Thailand. *Trop. Conserv. Sci.* **2011**, *4*, 113–131. <https://doi.org/10.1177/194008291100400203>.
9. Fiderer, C.; Göttert, T.; Zeller, U. Spatial Interrelations between Raccoons (*Procyon lotor*), Red Foxes (*Vulpes vulpes*), and Ground-Nesting Birds in a Special Protection Area of Germany. *Eur. J. Wildl. Res.* **2019**, *65*, 1–14. <https://doi.org/10.1007/s10344-018-1249-z>.
